# Supplementary material for: Biglycan Is a Novel Mineralocorticoid Receptor Target Involved in Aldosterone/Salt-Induced Glomerular Injury
Source: MDPI journal article supplement (doi:10.3390/ijms23126680), 2022-06-15
Supplement: s1 [file s1]

## **Supplemental Material**

### **Biglycan is a novel mineralocorticoid receptor target involved in aldosterone/salt-induced glomerular injury**

Toshifumi Nakamura<sup>1</sup>, Benjamin Bonnard<sup>1</sup>, Roberto Palacios-Ramirez<sup>1</sup>, Amaya Fernández-Celis<sup>2</sup>, Frédéric Jaisser<sup>1,3</sup>, and Natalia López-Andrés<sup>2</sup>.

<sup>1</sup> Centre de Recherche des Cordeliers, INSERM, Sorbonne Université, Université de Paris, 75006 Paris, France.

<sup>2</sup> Cardiovascular Translational Research, Navarrabiomed (Miguel Servet Foundation), Instituto de Investigación Sanitaria de Navarra (IdiSNA), Pamplona, Spain.

<sup>3</sup> INSERM, Clinical Investigation Centre 1433, French-Clinical Research Infrastructure Network (F-CRIN) INI-CRCT (Cardiovascular and Renal Clinical Trialists), Nancy, France.

**A**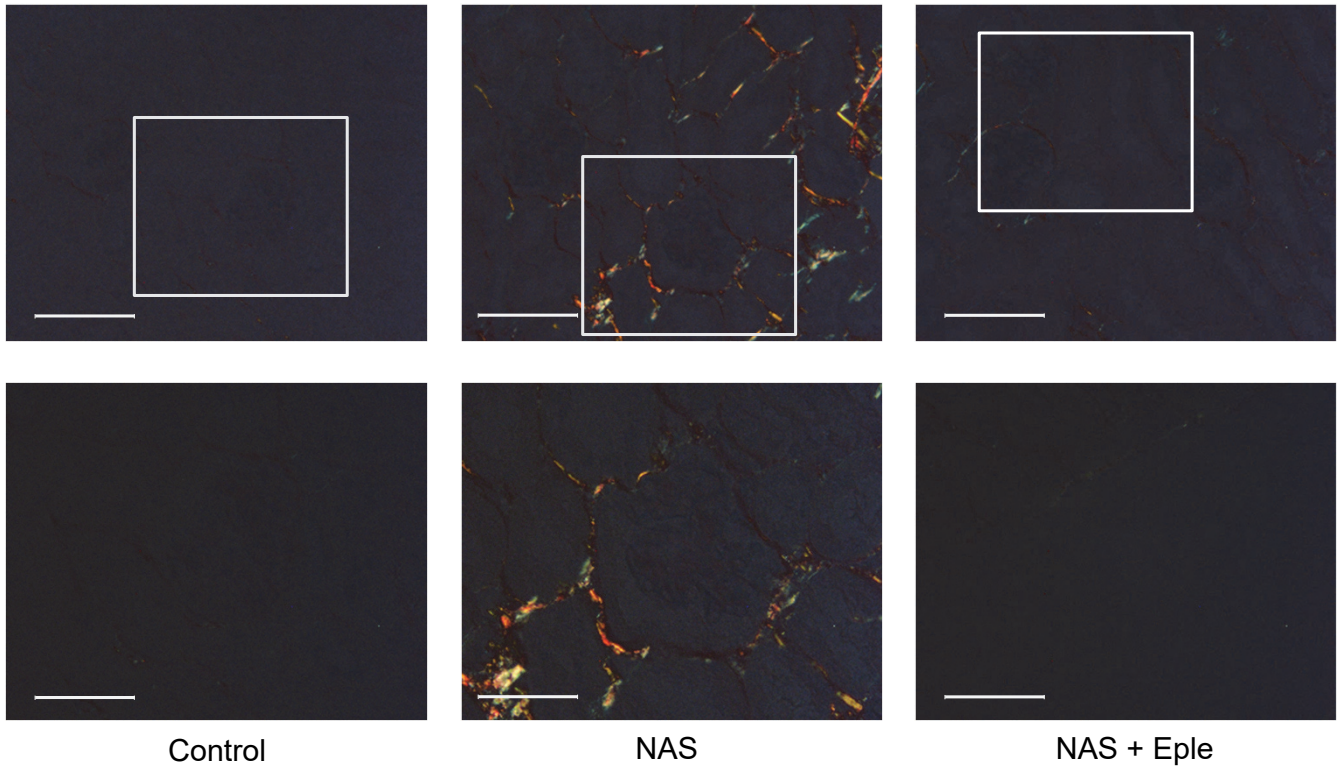**B**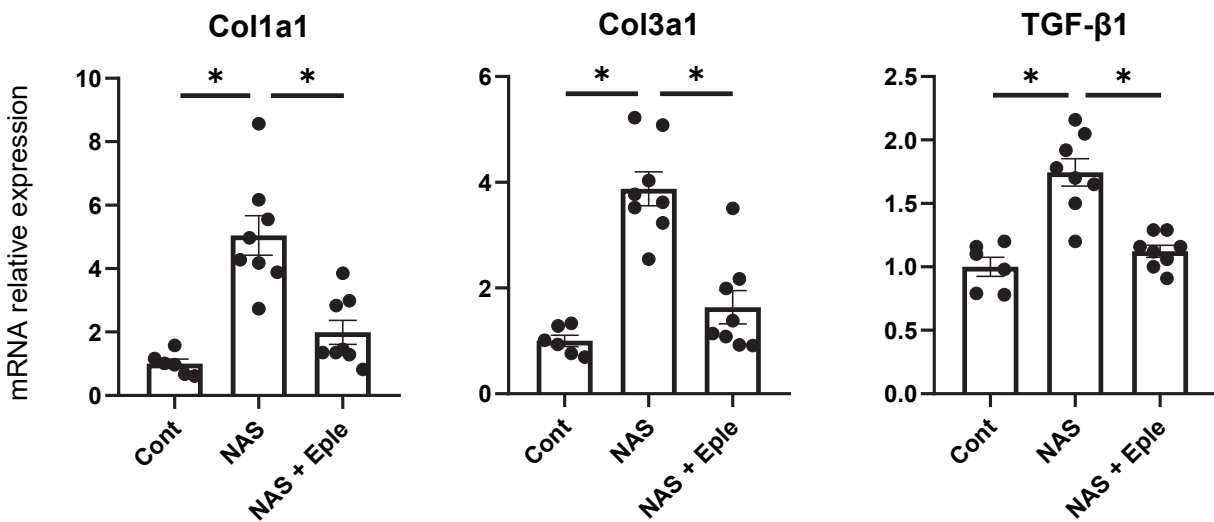

**Figure S1. NAS treatment-induced renal fibrosis is blunted by eplerenone.**

Representative microphotographs of mouse kidney sections with Sirius red observed by polarized light microscopy (A). Profibrotic gene mRNA levels (B). 20× (scale bar = 100 μm) and 40× (scale bar = 50 μm) magnification. One-way ANOVA was used for statistical analysis, n = 6–8. \*P < 0.05. NAS, uninephrectomy/aldosterone/salt; Eple, eplerenone; Col1a1, collagen type 1a1; Col3a1, collagen type 3a1; TGF-β1, transforming growth factor-β1.

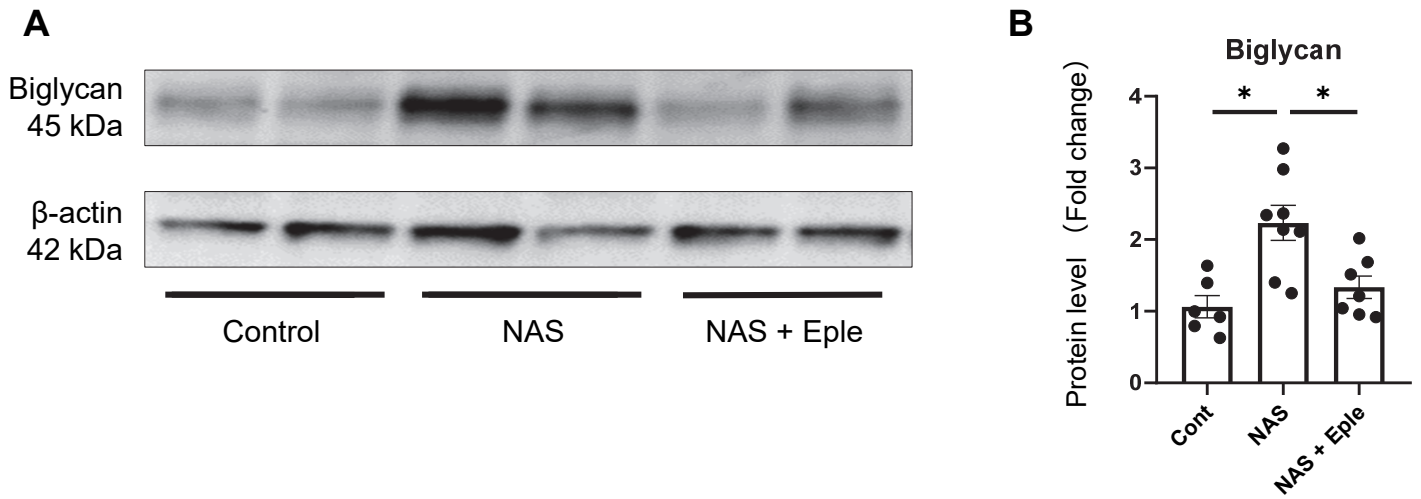

**Figure S2. Eplerenone blunts the NAS-induced increase of biglycan expression in the kidney cortex.**

Representative immunoblots of biglycan and  $\beta$ -actin. The box plots show the individual data normalized to the level of  $\beta$ -actin. One-way ANOVA was used for statistical analysis,  $n = 6-8$ . \* $P < 0.05$ . NAS, uninephrectomy/aldosterone/salt; Eple, eplerenone.

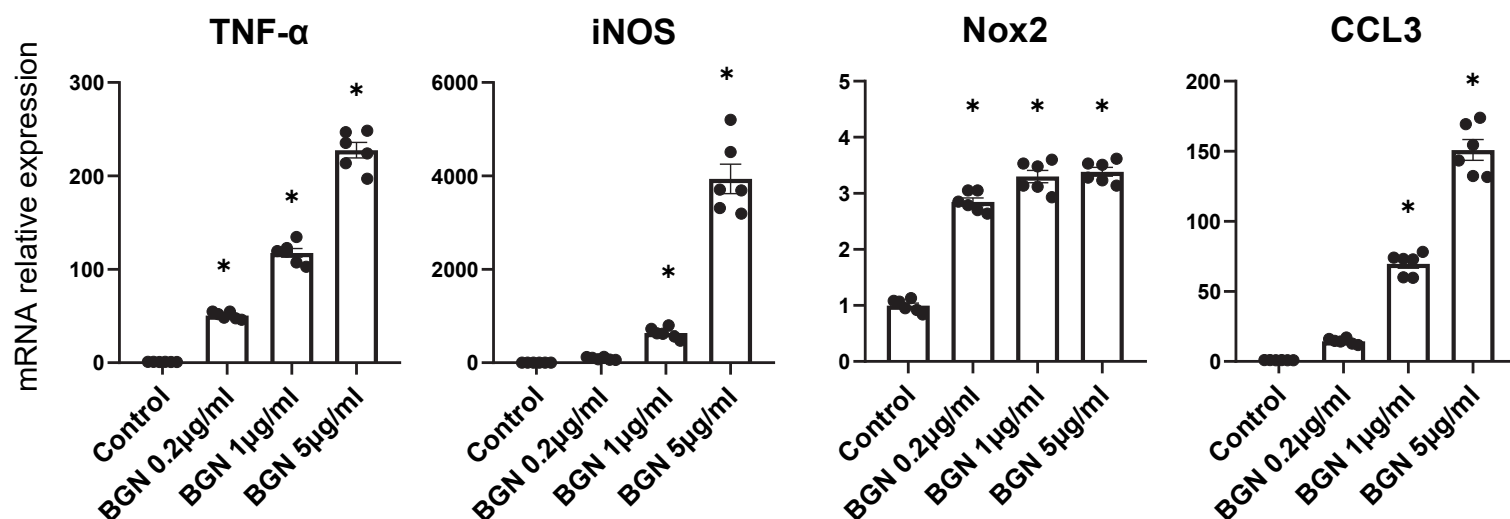

**Figure S3. Dose-dependency of the biglycan effect on macrophages.**

Isolated peritoneal macrophages were treated with the indicated concentrations of biglycan (0.2–5.0  $\mu$ g/ml) for 4 h. One-way ANOVA was used for statistical analysis,  $n = 6–8$ . \* $P < 0.05$ . TNF- $\alpha$ , tumor necrosis factor- $\alpha$ ; iNOS, inducible nitric oxide synthase; Nox2, NADPH oxidase 2; CCL3, C-C motif chemokine ligand 3; BGN, biglycan.

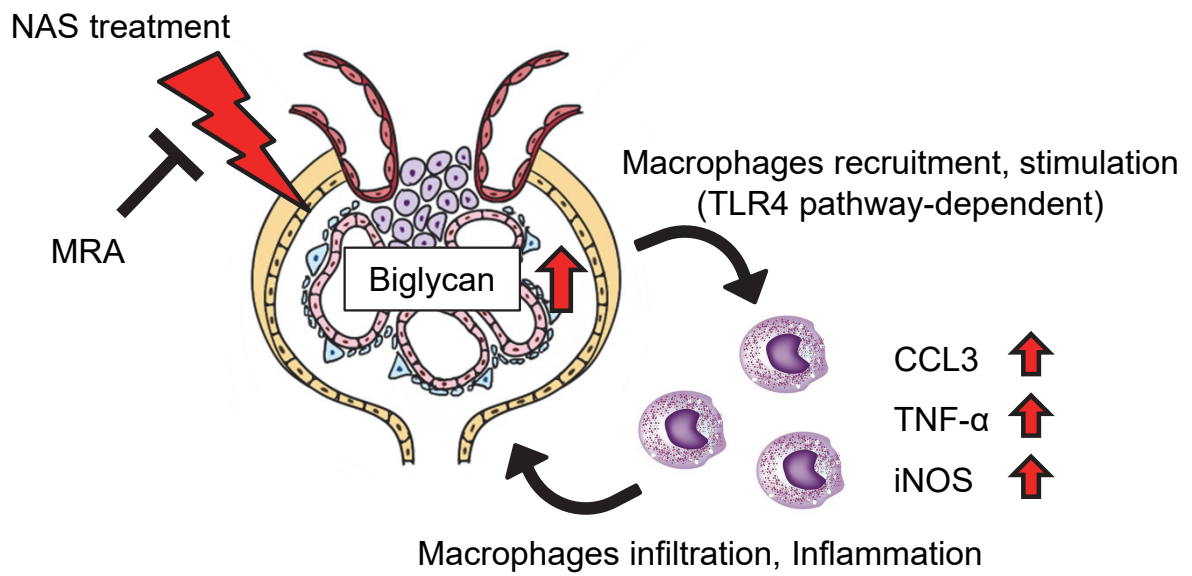

**Figure S4. Proposed mechanism of biglycan-induced glomerular injury**

**Table S1. Primers used for gene expression analyses**

| Gene product name |         | Primer Sequence                 |
|-------------------|---------|---------------------------------|
| GAPDH             | Forward | 5'-AATGGTGAAGGTCGGTGTG-3'       |
|                   | Reverse | 5'-GAAGATGGTGATGGGCTTCC-3'      |
| Collagen type 1a1 | Forward | 5'-GCTCCTCTTAGGGGCCACT-3'       |
|                   | Reverse | 5'-CCACGTCTCACCATTGGGG-3'       |
| Collagen type 3a1 | Forward | 5'-CTGGAGCCCCTGGACTAATAG-3'     |
|                   | Reverse | 5'-GCCCATTTGCACCAGGTTCT-3'      |
| TGF- $\beta$ 1    | Forward | 5'-TGCGCTTGCAGAGATTAAAA-3'      |
|                   | Reverse | 5'-CTGCCGTACAACCTCCAGTGA-3'     |
| Lumican           | Forward | 5'-TCGAGCTTGATCTCTCCTAT -3'     |
|                   | Reverse | 5'-TGGTCCCAGGATCTTACAGAA-3'     |
| Biglycan          | Forward | 5'-CTACGCCCTGGTCTTGGTAA-3'      |
|                   | Reverse | 5'-ACTTTGCGGATACGTTGTG-3'       |
| Syndecan-1        | Forward | 5'-ACTTCACCTTTGAAACATCTGGG-3'   |
|                   | Reverse | 5'-CATCCGGTACAGCATGAAAGC-3'     |
| Syndecan-4        | Forward | 5'-CATCTTTGAGAGAACTGAGGTCTTG-3' |
|                   | Reverse | 5'-CCTTCTTCTTCATGCGGTACA-3'     |
| CD68              | Forward | 5'-ACAAGGGACACTTCGGGCCA-3'      |
|                   | Reverse | 5'-GTCGTCTGCGGGTGATGCAG-3'      |
| CD86              | Forward | 5'-AGCAGACGCGTAAGAGTGGCT-3'     |
|                   | Reverse | 5'-CATGGTGCATCTGGGGTCCATC-3'    |
| CD206             | Forward | 5'-CCACAGCATTGAGGAGTTTG-3'      |
|                   | Reverse | 5'-ACAGCTCATCATTTGGCTCA-3'      |
| CCL2              | Forward | 5'-GGCTGGAGAGCTACAAGAGG-3'      |
|                   | Reverse | 5'-TCTTGAGCTTGGTGACAAAAC-3'     |
| CXCL2             | Forward | 5'-ATCCAGAGCTTGAGTGTGACGC-3'    |
|                   | Reverse | 5'-AAGGCAAACTTTTGACCGCC-3'      |
| CCL5              | Forward | 5'-GCCCTCACCATCATCCTCACT-3'     |
|                   | Reverse | 5'-GGCGGTTCTTCGAGTGACA-3'       |
| CXCL13            | Forward | 5'-ATATGTGTGAATCCTCGTGCCA-3'    |
|                   | Reverse | 5'-GGGAGTTGAAGACAGACTTTTGC-3'   |
| CCL3              | Forward | 5'-TTCTCTGTACCATGACACTCTGC-3'   |
|                   | Reverse | 5'-CGTGGAATCTTCCGGCTGTAG-3'     |
| TNF- $\alpha$     | Forward | 5'-CATCTTCTCAAAATTCGAGTGACAA-3' |
|                   | Reverse | 5'-TGGGAGTAGACAAGGTACAACCC-3'   |
| iNOS              | Forward | 5'-GCCAAGGCCAAACACAGCATAC-3'    |
|                   | Reverse | 5'-TGGCCACCTTGTTTCAGCTACG-3'    |
| Nox2              | Forward | 5'-CGCCCTTTGCCTCCATTCTC-3'      |
|                   | Reverse | 5'-CCTTTCCTGCATCTGGGTCTCC-3'    |

GAPDH, glyceraldehyde 3-phosphate dehydrogenase; TGF- $\beta$ 1, transforming growth factor  $\beta$ 1; CCL2, C-C motif chemokine ligand 2; CCL3, C-C motif chemokine ligand 3; CCL5, C-C motif chemokine ligand 5; CXCL2, C-X-C motif chemokine ligand 2; CXCL13, C-X-C motif chemokine ligand 13; TNF- $\alpha$ , tumor necrosis factor- $\alpha$ ; iNOS, inducible nitric oxide synthase; Nox2, NADPH oxidase 2.
